# Supplementary material for: Does cotrimoxazole prophylaxis in HIV patients increase the drug resistance of pneumococci? A comparative cross-sectional study in southern Ethiopia
Source: PLoS One. 2020 Dec 7;15(12):e0243054. doi: 10.1371/journal.pone.0243054 (PMC7721141; doi:10.1371/journal.pone.0243054)
Supplement: S1 Dataset — (XLS) [file pone.0243054.s004.xls]

## Sheet: cotrim
	Raw data view for the research project entitled project :Does cotrimoxazole prophylaxis treatment of HIV infected adults increase risk of nasopharyngeal carriage of resistant pneumococci? Comparative cross sectional study in Southern Ethiopia: from ____________to ___________________________
	Independent variables																							tested antimicrobial and result
code	age in years	sex	eduction Grade Level	religion	residence	living with smoker	No of people in house	sleeping with children	presence of Sibling <5	sibling >5	No of rooms	resent antibiotic use	Hospitilization	day care attendance	CD4 count catagory	URTI	LRTI	CTXP	CTXPdose	duration of and ART vist Catagory	living with family member taking drug	HAART	Pneumocci culture positive	cotrimoxazole	Oxacillin	Penicillin	chloramphenicol	Erthromycine	tetracyclin	vancomycin	levofloxacine	PrimaryLast	filter_$
C001	25	2	4	1	1	2	1	2	2	1	1	1	2	2	1	3	3	1	2	1	2	2	negative									1	0
C002	40	2	11	5	2	2	1	2	2	2	1	1	2	2	1	2	3	1	2	2	2	1	negative									1	0
C003	26	2	9	1	2	2	1	2	2	2	1	2	2	2	1	888	888	1	2	1	1	1	negative									1	0
C004	12	1	4	3	1	2	3	2	2	1	1	2	2	1	1	3	3	1	1	1	2	1	1	resistance	sensitive		sensitive	sensetive	resistance	sensitive	sensitive	1	0
C005	60	2	888	3	1	2	1	2	2	2	1	2	2	2	1	3	3	1	2	2	2	1	negative									1	0
C006	32	1	5	3	1	2	3	2	1	1	2	2	2	2	1	3	3	1	2	1	2	1	negative									1	0
C007	40	1	2	3	1	2	3	1	1	1	1	2	1	2	1	3	3	1	2	2	2	1	1	resistance	sensitive		sensitive	sensetive	resistance	sensitive	sensitive	1	0
C008	30	1	7	1	1	2	1	2	2	2	1	2	2	2	1	3	3	1	1	2	2	1	negative									1	0
C009	43	1	5	3	1	2	1	2	2	2	1	1	2	2	1	3	3	1	2	2	2	1	negative									1	0
C010	45	1	5	1	2	1	2	2	2	1	1	1	2	2	1	3	3	1	2	1	2	1	negative									1	0
C011	50	1	9	1	2	2	3	1	1	1	2	1	2	2	1	3	3	1	2	4	2	1	negative									1	0
C012	32	1	5	3	1	2	1	2	2	1	2	1	2	2	1	3	3	1	2	2	2	1	negative									1	0
C013	35	1	8	1	1	2	1	2	2	2	1	2	2	2	1	3	3	1	2	2	2	1	negative									1	0
C014	19	1	12	1	1	2	1	1	2	2	1	1	2	2	1	3	3	1	1	2	2	1	1	resistance	resistance	resistance	resistace	intermediate	resistance	sensitive	sensitive	1	0
C015	45	1	888	3	1	2	1	2	1	2	2	2	2	2	1	3	3	1	2	1	2	1	1	resistance	resistance	resistance	resistace	resistance	resistance	sensitive	sensitive	1	0
C016	29	1	4	1	1	2	1	2	2	2	1	2	2	2	1	3	3	1	2	2	2	1	negative									1	0
C017	42	1	1	3	1	2	2	2	2	2	1	2	2	2	1	3	2	1	2	2	2	1	negative									1	0
C018	40	1	7	3	1	2	1	2	2	2	1	2	2	2	1	3	3	1	2	2	2	1	negative									1	0
C019	35	1	11	1	1	2	1	2	2	2	1	2	2	2	1	3	3	1	2	2	2	1	negative									1	0
C020	35	2	2	3	3	1	2	3	2	2	1	2	2	2	1	1	3	1	2	2	2	1	negative									1	0
C021	30	2	4	1	1	2	3	2	2	2	1	2	2	2	1	3	3	1	2	2	2	1	negative									1	0
C022	35	1	12	3	2	2	1	2	2	2	2	2	2	2	1	3	3	1	2	2	2	1	negative									1	0
C023	35	1	888	1	1	2	1	2	2	2	1	2	2	2	1	3	3	1	2	2	1	1	negative									1	0
C024	30	2	888	3	1	2	1	2	2	2	1	2	2	2	1	3	3	1	2	2	2	1	negative									1	0
C025	35	1	4	2	1	2	1	2	1	2	1	1	2	2	1	3	3	1	2	2	2	1	negative									1	0
C026	41	1	9	1	1	1	1	2	2	2	1	2	2	2	1	3	3	1	2	2	2	1	negative									1	0
C027	32	1	12	3	1	2	1	2	2	2	1	2	2	2	1	3	3	1	2	1	2	1	negative									1	0
C028	48	1	12	1	1	2	2	1	2	1	2	2	2	2	1	3	3	1	2	2	2	1	negative									1	0
C029	46	1	6	3	1	2	1	2	2	2	2	2	2	2	1	3	3	1	2	2	2	1	1	sensitive	sensitive		sensitive	sensetive	resistance	sensitive	sensitive	1	0
C030	47	1	1	2	1	2	2	2	1	2	2	2	1	3	1	1	2	1	2	1	2	1	negative									1	0
C031	47	2	888	3	1	2	2	2	2	2	1	2	2	2	1	3	3	1	2	2	2	1	negative									1	0
C032	32	2	8	1	1	2	3	2	1	1	1	2	2	2	1	3	3	1	2	2	2	1	negative									1	0
C033	60	2	7	1	1	2	2	2	2	2	1	2	2	2	1	3	3	1	2	2	2	1	negative									1	0
C034	45	1	3	1	1	2	1	2	2	2	1	2	2	2	1	3	3	1	2	1	2	1	negative									1	0
C035	40	2	6	3	1	2	3	2	2	1	2	2	2	2	1	3	3	1	2	1	2	1	negative									1	0
C036	35	1	8	1	1	2	1	2	2	1	1	2	2	2	1	3	3	1	2	2	2	1	negative									1	0
C037	32	1	888	1	1	2	1	2	2	2	1	2	2	2	1	3	3	1	2	1	2	1	1	resistance	resistance	resistance	sensitive	sensetive	resistance	sensitive	sensitive	1	0
C038	42	1	8	1	1	2	1	2	2	2	1	2	2	2	1	3	3	1	2	2	2	1	negative									1	0
C039	28	1	2	1	1	2	1	2	2	2	1	2	2	2	1	3	3	1	2	1	2	1	negative									1	0
C040	30	2	888	1	1	2	2	2	2	1	1	2	2	2	1	3	3	1	2	2	2	1	negative									1	0
C041	35	2	888	3	1	2	3	2	1	1	1	2	2	2	1	3	3	1	2	2	2	1	negative									1	0
C042	30	2	8	1	1	2	3	1	2	1	2	2	1	2	1	3	3	1	2	2	2	1	1	resistance	resistance	resistance	resistace	resistance	resistance	sensitive	sensitive	1	0
C043	35	2	4	3	1	2	3	2	2	1	2	2	2	2	1	3	3	1	2	2	2	2	negative									1	0
C044	50	2	888	1	1	2	1	1	2	1	2	2	2	2	1	2	3	1	2	1	2	1	negative									1	0
C045	42	1	10	3	1	2	3	1	2	1	2	2	2	2	1	3	3	1	888	1	2	1	negative									1	0
C046	30	1	8	3	1	2	1	2	2	1	1	2	2	2	1	3	3	1	2	1	2	1	1	sensitive	sensitive		sensitive	sensetive	resistance	sensitive	sensitive	1	0
C047	43	1	8	1	1	2	1	2	2	1	1	2	2	2	1	3	3	1	2	2	2	1	negative									1	0
C048	40	1	10	1	1	2	2	2	1	1	2	2	2	2	1	3	3	1	2	1	2	1	negative									1	0
C049	45	2	10	1	1	2	3	2	2	1	2	2	2	2	1	3	3	1	2	2	2	1	negative									1	0
C050	30	888	10	1	1	2	3	1	2	1	1	2	2	2	1	3	3	1	1	2	2	2	1	resistance	resistance	resistance	sensitive	sensetive	resistance	sensitive	sensitive	1	0
C051	37	2	4	1	1	2	1	2	2	1	1	2	2	2	1	3	3	1	2	1	2	1	negative									1	0
C052	36	2	12	1	1	2	1	2	2	2	2	2	2	2	1	3	3	1	2	2	2	1	negative									1	0
C054	42	1	1	3	1	2	2	2	2	2	1	2	2	2	1	3	3	1	2	2	2	1	1	sensitive	resistance	resistance	sensitive	sensetive	resistance	sensitive	sensitive	1	0
C053	40	2	888	1	1	1	3	2	2	1	1	2	2	2	1	3	3	1	2	2	2	1	negative									1	0
C055	50	1	10	1	1	2	2	1	2	1	2	2	1	2	1	3	3	1	2	2	2	1	1	resistance	resistance	resistance	sensitive	sensetive	resistance	sensitive	sensitive	0	0
C056	55	1	4	2	1	2	3	1	2	1	2	2	2	2	1	3	3	1	2	2	2	1	negative									1	0
C057	50	2	888	1	1	2	3	2	2	1	2	2	1	2	1	3	3	1	2	1	2	1	negative									1	0
C058	44	1	9	1	1	2	2	2	2	1	1	1	2	2	1	3	3	1	2	2	2	1	negative									1	0
C059	55	1	888	1	1	2	2	2	1	1	1	2	2	2	1	3	3	1	2	1	2	1	negative									1	0
C060	35	1	8	1	1	2	1	2	2	1	1	2	2	2	1	3	3	1	2	1	2	1	negative									1	0
C061	40	2	6	1	1	2	1	2	2	2	1	2	2	2	1	3	3	1	2	2	2	1	negative									1	0
C062	45	2	888	1	1	2	1	2	2	1	1	2	2	2	1	3	2	1	2	2	2	1	negative									1	0
C063	40	2	888	1	1	2	3	2	2	1	2	2	2	2	1	3	3	1	2	2	2	1	negative									1	0
C064	67	1	8	3	1	2	1	1	2	2	1	2	2	2	1	3	3	1	2	2	2	1	1	resistance	resistance	resistance	sensitive	sensetive	resistance	sensitive	sensitive	1	0
C065	35	2	12	1	1	2	3	2	1	1	2	2	2	2	1	3	3	1	2	2	2	1	negative									1	0
C066	32	1	8	3	1	2	1	2	2	1	1	2	2	2	1	3	3	1	2	2	2	1	negative									1	0
C067	35	2	7	1	1	2	1	2	1	1	1	2	2	2	1	3	3	1	2	2	2	1	negative									1	0
C068	22	2	888	1	1	2	2	2	1	1	2	2	2	2	1	3	3	1	2	1	2	1	negative									1	0
C069	40	1	888	1	1	2	1	1	2	2	1	2	2	2	1	3	3	1	2	2	2	1	1	resistance	resistance	resistance	sensitive	sensetive	resistance	sensitive	sensitive	1	0
C070	50	2	2	1	1	2	1	2	2	2	1	2	2	1	1	3	3	1	2	2	2	1	negative										0
C071	47	1	10	1	1	2	1	2	2	2	1	2	2	2	1	3	3	1	2	2	2	1	negative										0
C072	40	1	5	3	1	2	1	2	2	1	2	2	2	2	1	3	3	1	2	2	2	1	negative										0
C073	46	1	12	1	1	2	3	1	2	1	2	2	2	2	1	3	3	1	2	1	2	1	negative										0
C074	47	1	10	3	1	2	3	2	2	1	1	2	1	2	1	3	3	1	2	1	2	1	negative										0
C075	46	2	6	1	1	2	3	2	1	2	1	2	2	2	1	3	3	1	2	2	2	1	negative										0
C076	51	1	3	1	1	1	1	1	2	1	2	2	2	2	1	3	3	1	2	2	2	1	1	resistance	resistance	resistance	sensitive	sensetive	resistance	sensitive	sensitive	1	0
C077	40	1	5	3	1	2	1	2	2	2	1	1	2	2	1	3	3	1	2	2	2	1	negative									1	0
C078	34	1	10	1	1	2	2	2	1	1	2	2	2	2	1	3	3	1	2	1	2	1	negative									1	0
C079	25	1	4	1	1	2	1	2	2	1	1	1	2	1	1	3	3	1	2	1	2	2	1	sensitive	sensitive		sensitive	sensetive	resistance	sensitive	sensitive	1	0
C080	41	2	10	5	2	2	1	2	2	2	1	1	2	2	1	2	3	1	2	2	2	1	negative									1	0
C081	45	2	10	1	1	2	3	2	2	1	2	2	2	2	1	3	3	1	2	2	2	1	negative									1	0
C082	23	1	8	1	2	2	1	2	2	2	1	2	2	2	1	3	3	1	2	1	888	1	negative									1	0
C083	16	1	6	2	1	2	3	2	2	1	1	2	2	1	1	3	3	1	1	1	2	1	negative									1	0
C084	45	1	8	3	1	2	1	2	2	2	1	2	2	2	1	3	3	1	2	1	2	1	1	sensitive	resistance	resistance	sensitive	sensetive	resistance	sensitive	sensitive	1	0
C085	32	1	5	3	1	2	3	2	1	1	2	2	2	1	1	3	3	1	2	2	2	1	negative									1	0
C086	33	1	6	3	1	2	3	2	1	1	1	2	1	2	1	3	3	1	2	2	2	1	negative									1	0
C087	30	1	7	1	1	2	1	2	2	2	1	2	2	2	1	3	3	1	1	2	2	1	negative									1	0
C088	33	1	888	1	2	1	2	2	2	1	1	1	2	2	1	3	3	1	2	1	2	1	negative									1	0
C089	42	1	8	1	2	2	3	1	1	1	2	1	2	2	1	3	3	1	2	1	2	1	1	sensitive	sensitive		sensitive	sensetive	resistance	sensitive	sensitive	1	0
C090	30	1	8	1	1	2	1	2	2	2	1	2	2	2	1	3	3	1	2	2	2	1	negative										0
C091	18	1	10	1	1	2	1	2	2	2	1	1	2	2	1	3	3	1	1	2	2	1	negative										0
C092	33	2	5	1	1	2	3	2	2	1	2	2	2	2	1	3	3	1	1	1	2	1	negative										0
C093	34	1	6	2	1	2	1	2	1	2	2	2	2	2	1	3	3	1	2	1	2	1	1	resistance	resistance	resistance	sensitive	sensetive	resistance	sensitive	sensitive	1	0
C094	25	1	9	1	1	2	1	2	2	2	1	2	2	2	1	3	3	1	2	2	2	1	negative									0	0
C095	32	1	7	2	1	2	1	2	2	2	1	2	2	2	1	3	3	1	2	1	2	1	negative									1	0
C096	35	1	11	1	1	2	1	2	2	2	1	2	2	2	1	3	3	1	2	2	2	1	negative									1	0
C097	35	2	2	3	3	1	2	3	2	2	1	2	2	2	1	1	3	1	2	2	2	1	negative									1	0
C098	30	2	4	1	1	2	3	2	2	2	1	2	2	2	1	3	3	1	2	2	2	1	negative									1	0
C099	35	1	12	3	2	2	1	2	2	2	2	2	2	2	1	3	3	1	2	1	2	1	negative									1	0
C100	35	1	888	1	1	2	1	2	2	2	1	2	2	2	1	3	3	1	2	2	1	1	negative									1	0
C101	30	2	888	3	1	2	1	2	2	2	1	2	2	2	1	3	3	1	2	2	2	1	negative									1	0
C102	35	1	4	2	1	2	1	2	1	2	1	1	2	2	1	3	3	1	2	2	2	1	negative									1	0
C103	41	1	9	1	1	1	1	2	2	2	1	2	2	2	1	3	3	1	2	2	2	1	negative									1	0
C104	32	1	5	3	1	2	1	2	2	1	2	1	2	2	1	3	3	1	2	2	2	1	negative									1	0
C105	32	1	12	3	1	2	1	2	2	2	1	2	2	2	1	3	3	1	2	2	2	1	negative									1	0
C106	35	2	11	1	1	2	2	1	2	1	2	2	2	2	1	3	3	1	2	2	2	1	negative									1	0
C107	46	1	6	3	1	2	1	1	2	2	2	2	2	2	1	3	3	1	2	2	2	1	1	resistance	resistance	resistance	sensitive	sensetive	resistance	sensitive	sensitive	1	0
C108	47	2	5	1	1	2	2	2	1	2	2	2	1	3	1	1	2	1	2	1	2	1	negative									1	0
C109	40	2	888	2	1	2	2	2	2	2	1	2	2	2	1	3	3	1	2	2	2	1	negative									1	0
C110	32	1	10	1	1	2	3	2	1	1	1	2	2	2	1	3	3	1	2	2	2	1	negative									1	0
C111	43	1	6	1	1	2	2	2	2	2	1	2	2	2	1	3	3	1	2	2	2	1	negative									1	0
C112	46	1	7	1	1	2	1	2	2	2	1	2	2	2	1	3	3	1	2	1	2	1	negative									1	0
C113	27	1	2	3	1	2	3	2	2	1	2	2	2	2	1	3	3	1	2	1	2	1	negative									1	0
C114	35	1	8	1	1	2	1	2	2	1	1	2	2	2	1	3	3	1	2	2	2	1	negative									1	0
C115	29	1	5	3	1	2	1	2	2	2	1	2	2	2	1	3	3	1	2	2	2	1	negative									1	0
C116	42	2	8	2	1	2	1	2	2	2	1	2	2	2	1	3	3	1	2	2	2	1	negative									1	0
C117	28	1	2	1	1	2	1	2	2	2	1	2	2	2	1	3	3	1	2	2	2	1	negative									1	0
C118	30	2	888	1	1	2	2	2	2	1	1	2	2	2	1	3	3	1	2	1	2	1	negative									1	0
C119	35	2	5	3	1	2	3	2	1	1	1	2	2	2	1	3	3	1	2	2	2	1	negative									1	0
C120	30	2	8	1	1	2	3	1	2	1	2	2	1	2	1	3	3	1	2	1	2	1	negative									1	0
C121	32	2	4	3	1	2	3	2	2	1	2	2	2	2	1	3	3	1	2	1	2	2	negative									1	0
C122	50	2	8	1	1	2	1	1	2	1	2	2	2	2	1	2	3	1	2	2	2	1	negative									1	0
C123	42	1	9	3	1	2	3	1	2	1	2	2	2	2	1	3	3	1	2	1	2	1	negative									1	0
C124	25	1	8	3	1	2	1	2	2	1	1	2	2	2	1	3	3	1	2	2	2	1	negative									1	0
C125	43	1	8	1	1	2	1	2	2	1	1	2	2	2	1	3	3	1	2	2	2	1	negative									1	0
C126	30	2	13	1	1	2	1	2	2	1	1	2	2	2	1	3	3	1	2	1	2	1	negative									1	0
NC001	36	2	888	1	1	2	2	2	2	1	1	2	2	1	1	3	3	2	2	1	2	1	negative									1	1
NC002	40	1	888	3	1	2	3	2	1	1	1	2	2	1	2	3	3	2	NA	1	2	1	negative									1	1
NC003	30	2	888	1	1	2	2	2	1	2	1	2	2	2	2	3	3	2	NA	1	2	1	negative									1	1
NC004	30	2	13	3	1	2	3	1	1	2	2	2	2	2	2	3	2	2	NA	2	2	1	1	sensitive	sensitive		sensitive	sensetive	sensitive	sensitive	sensitive	1	1
NC005	50	1	8	1	1	2	2	1	2	1	2	2	2	2	2	3	3	2	NA	2	2	1	negative									1	1
NC006	35	2	888	3	1	2	3	1	2	1	2	1	2	2	2	3	2	2	NA	1	2	1	negative									1	1
NC007	14	1	6	1	1	2	1	2	2	1	2	2	2	1	2	3	3	2	NA	1	2	1	negative									1	1
NC008	40	2	12	3	1	2	1	1	2	2	2	2	2	2	2	3	3	2	NA	2	2	1	negative									1	1
NC009	30	1	10	3	2	2	2	2	2	1	2	2	2	2	2	3	3	2	NA	2	2	1	negative									1	1
NC010	30	2	8	1	1	2	1	2	2	2	1	2	2	2	2	3	3	2	NA	2	2	1	negative									1	1
NC011	55	1	888	3	2	2	2	2	1	1	1	2	2	2	2	3	3	2	NA	1	2	1	negative									1	1
NC012	42	1	9	1	1	2	2	1	2	1	2	2	2	2	2	3	3	2	NA	2	2	2	negative									1	1
NC013	10	1	1	1	1	2	2	2	2	1	1	2	2	1	2	3	3	2	NA	1	2	2	negative									1	1
NC014	8	2	1	3	1	2	2	2	1	1	1	2	2	2	2	3	3	2	NA	1	2	1	negative									1	1
NC015	45	1	1	1	1	1	1	2	2	1	1	2	2	2	2	3	3	2	NA	1	2	1	1	sensitive	sensitive		sensitive	sensetive	resistance	sensitive	sensitive	1	1
NC016	30	2	888	3	1	2	3	2	2	1	1	1	2	1	2	3	3	2	NA	1	2	1	negative									1	1
NC017	50	1	6	1	1	1	3	2	2	2	1	2	2	2	2	3	3	2	NA	1	2	1	negative									1	1
NC018	35	2	10	2	1	2	1	1	2	2	2	2	2	2	2	3	3	2	NA	1	2	1	negative									1	1
NC019	27	1	8	1	2	2	2	2	2	1	2	2	2	2	2	3	3	2	NA	1	2	1	1	sensitive	resistance	resistance	sensitive	sensetive	sensitive	sensitive	sensitive	1	1
NC020	40	1	8	1	1	2	3	1	1	1	2	2	2	2	2	3	3	2	NA	2	2	1	negative									1	1
NC021	45	2	4	2	1	2	1	2	2	1	2	2	2	2	2	3	3	2	NA	2	2	1	negative									1	1
NC022	20	2	888	1	1	1	1	1	2	2	1	2	2	2	2	3	3	2	NA	2	2	1	1	resistance	resistance	resistance	sensitive	intermediate	resistance	sensitive	sensitive	1	1
NC023	45	1	10	1	1	2	2	2	1	1	1	2	2	2	2	3	3	2	NA	2	2	1	negative									1	1
NC024	50	1	12	1	2	2	3	2	2	2	2	2	2	2	2	3	3	2	NA	2	2	1	negative									1	1
NC025	33	1	10	1	1	2	1	2	2	2	1	2	2	2	2	3	3	2	NA	2	2	1	1	sensitive	sensitive		sensitive	sensetive	sensitive	sensitive	sensitive	1	1
NC026	47	2	15	1	2	2	1	2	2	2	2	2	2	2	2	3	3	2	NA	2	2	1	negative									1	1
NC027	35	2	5	1	1	2	1	2	2	2	1	2	2	2	2	3	3	2	NA	2	2	1	negative									1	1
NC028	55	1	888	1	1	2	3	1	3	2	2	2	2	2	2	3	3	2	NA	2	2	1	negative									1	1
NC029	48	1	12	1	1	2	1	2	2	2	1	2	2	2	2	3	3	2	NA	2	2	1	negative									1	1
NC030	60	1	13	1	1	2	3	1	2	1	2	2	2	2	2	3	3	2	NA	2	2	1	negative									1	1
NC031	32	2	888	1	1	2	1	2	2	2	1	2	2	2	2	3	2	2	NA	2	2	1	negative									1	1
NC032	35	1	8	1	1	1	2	1	1	1	2	2	2	2	2	3	3	2	NA	2	2	2	negative									1	1
NC033	60	1	888	1	1	2	1	2	2	2	1	2	2	2	2	3	3	2	NA	2	2	1	1	sensitive	sensitive		sensitive	sensetive	resistance	sensitive	sensitive	1	1
NC034	30	2	888	1	1	2	2	2	1	2	1	2	2	2	2	3	3	2	NA	1	2	1	negative									1	1
NC035	35	1	11	1	1	2	3	1	2	1	2	2	2	2	2	3	3	2	NA	1	2	1	negative									0	1
NC036	40	1	4	1	1	2	1	2	2	2	1	2	2	2	2	3	3	2	NA	1	2	1	1	sensitive	resistance	resistance	sensitive	sensetive	0	sensitive	sensitive	1	1
NC037	26	2	9	2	1	2	1	2	2	1	1	2	2	2	2	3	3	2	NA	1	2	1	negative									1	1
NC038	43	1	8	3	1	2	2	2	2	1	2	2	2	2	2	3	3	2	NA	1	2	1	1	sensitive	sensitive		sensitive	sensetive	resistance	sensitive	sensitive	1	1
NC039	35	2	2	3	1	2	1	2	2	1	1	2	2	2	2	3	3	2	NA	1	2	1	negative									1	1
NC040	36	1	6	1	1	2	2	2	2	1	1	2	2	2	2	3	2	2	NA	2	2	1	negative									1	1
NC041	30	2	888	1	1	2	3	2	1	1	1	2	2	2	2	3	3	2	NA	1	2	1	1	resistance	sensitive		sensitive	sensetive	resistance	sensitive	sensitive	1	1
NC042	45	1	5	1	1	2	2	2	2	1	1	2	2	2	2	3	3	2	NA	1	2	2	negative									1	1
NC043	48	1	3	1	1	2	1	2	2	2	1	2	2	2	2	3	3	2	NA	2	2	1	negative									1	1
NC044	42	1	10	3	1	2	3	1	2	1	2	2	2	2	2	3	2	2	NA	1	2	1	negative									1	1
NC045	26	2	888	3	1	2	2	2	1	1	2	2	2	2	2	3	3	2	NA	1	2	1	negative									1	1
NC046	29	2	8	1	1	2	2	2	1	2	1	2	2	2	2	3	3	2	NA	2	2	1	negative									1	1
NC047	33	2	5	1	1	2	3	2	2	1	2	2	2	2	2	3	3	2	NA	1	2	1	negative									1	1
NC048	35	1	11	1	1	2	3	1	2	1	2	2	2	2	2	3	3	2	NA	1	2	1	negative									1	1
NC049	34	1	4	1	1	2	1	2	2	2	1	2	2	2	2	3	3	2	NA	2	2	1	negative									1	1
NC050	27	2	7	2	1	2	1	2	2	1	1	2	2	2	2	3	3	2	NA	1	2	1	negative									1	1
NC051	37	2	4	1	1	2	1	2	2	1	1	2	2	2	2	3	3	2	NA	2	2	1	negative									1	1
NC052	36	2	12	1	1	2	1	2	2	2	2	2	2	2	2	3	3	2	NA	2	2	1	negative									1	1
NC053	40	2	888	1	1	1	3	2	2	1	1	2	2	2	2	3	3	2	NA	2	2	1	negative									1	1
NC054	50	1	10	1	1	2	2	1	2	1	2	2	1	2	2	3	3	2	NA	1	2	1	negative									1	1
NC055	30	1	9	1	1	2	3	2	2	2	2	2	2	2	2	3	3	2	NA	2	2	1	negative									1	1
NC056	55	1	4	2	1	2	3	1	2	1	2	2	2	2	2	3	3	2	NA	2	2	1	negative									1	1
NC057	50	2	888	1	1	2	3	2	2	1	2	2	1	2	2	3	2	2	NA	2	2	1	1	resistance	resistance	resistance	resistace	resistance	resistance	sensitive	sensitive	1	1
NC058	44	1	9	1	1	2	2	2	2	1	1	1	2	2	2	3	3	2	NA	2	2	1	negative									1	1
NC059	55	1	888	1	1	2	2	2	1	1	1	2	2	2	2	3	3	2	NA	2	2	1	negative									1	1
NC060	35	1	8	1	1	2	1	2	2	1	1	2	2	2	2	3	3	2	NA	2	2	1	negative									1	1
NC061	40	2	6	1	1	2	1	2	2	2	1	2	2	2	2	3	3	2	NA	2	2	1	negative									1	1
NC062	29	2	10	2	1	2	2	2	1	2	1	2	2	2	2	3	3	2	NA	1	2	1	negative									1	1
NC063	31	2	6	1	1	2	3	2	2	1	2	2	2	2	2	3	3	2	NA	1	2	1	negative									1	1
NC064	27	1	10	1	1	2	3	1	2	1	2	2	2	2	2	3	3	2	NA	1	2	1	negative									1	1
NC065	30	1	8	1	1	2	1	2	2	2	1	2	2	2	2	3	3	2	NA	1	2	1	negative									1	1
NC066	32	2	7	1	1	2	1	2	2	1	1	2	2	2	2	3	3	2	NA	1	2	1	negative									1	1
NC067	37	2	8	1	1	2	1	2	2	1	1	2	2	2	2	3	3	2	NA	2	2	1	negative									1	1
NC068	36	2	10	1	1	2	1	2	2	2	2	2	2	2	2	3	3	2	NA	1	2	1	negative									1	1
NC069	38	2	888	2	1	1	3	2	2	1	1	2	2	2	2	3	3	2	NA	1	2	1	negative									1	1
NC070	41	1	8	1	1	2	2	1	2	1	2	2	1	2	2	3	3	2	NA	2	2	1	negative									1	1
NC071	55	2	888	1	1	2	3	1	2	1	2	2	2	2	2	3	3	2	NA	1	2	1	negative									1	1
NC072	42	1	11	3	1	2	3	2	1	1	2	2	2	2	2	3	3	2	NA	1	2	1	negative									1	1
NC073	30	2	13	1	1	2	1	2	2	1	1	2	2	2	2	3	3	2	NA	2	2	1	negative									1	1
NC074	51	2	888	1	1	2	3	1	2	1	2	2	2	2	2	3	3	2	NA	2	2	1	1	sensitive	sensitive		sensitive	sensetive	sensitive	sensitive	sensitive	1	1
NC075	66	2	4	1	1	2	1	2	2	2	1	2	2	2	2	3	3	2	NA	2	2	1	negative									1	1
NC076	47	2	3	1	1	2	1	2	2	2	2	2	2	2	2	3	3	2	NA	1	2	1	negative									1	1
NC077	48	1	888	1	1	2	2	1	2	2	2	2	2	2	2	3	3	2	NA	1	2	1	negative									1	1
NC078	40	1	8	1	1	2	3	1	1	1	2	2	2	2	2	3	3	2	NA	2	2	1	negative									1	1
NC079	45	2	4	2	1	2	1	2	2	1	2	2	2	2	2	3	2	2	NA	2	2	1	1	sensitive	sensitive		sensitive	sensetive	resistance	sensitive	sensitive	1	1
NC080	20	2	888	1	1	1	1	2	2	2	1	2	2	2	2	3	3	2	NA	2	2	1	negative									1	1
NC081	45	1	10	1	1	2	2	2	1	1	1	2	2	2	2	3	3	2	NA	2	2	1	negative									1	1
NC082	50	1	12	1	2	2	3	2	2	2	2	2	2	2	2	3	3	2	NA	2	2	1	negative									1	1
NC083	33	1	10	1	1	2	1	2	2	2	1	2	2	2	2	3	3	2	NA	2	2	1	negative									1	1
NC084	47	2	15	1	2	2	1	2	2	2	2	2	2	2	2	3	3	2	NA	2	2	1	negative									1	1
NC085	35	2	5	1	1	2	1	2	2	2	1	2	2	2	2	3	3	2	NA	2	2	1	negative									1	1
NC086	55	1	888	1	1	2	3	1	3	2	2	2	2	2	2	3	3	2	NA	1	2	1	negative									1	1
NC087	48	1	12	1	1	2	1	2	2	2	1	2	2	2	2	3	3	2	NA	1	2	1	negative									1	1
NC088	60	1	13	1	1	2	3	1	2	1	2	2	2	2	2	3	3	2	NA	2	2	1	negative									1	1
NC089	32	2	888	1	1	2	1	2	2	2	1	2	2	2	2	3	3	2	NA	1	2	1	negative									1	1
NC090	35	1	8	1	1	1	2	1	1	1	2	2	2	2	2	3	3	2	NA	2	2	2	negative									1	1
NC091	60	1	888	1	1	2	1	2	2	2	1	2	2	2	2	3	3	2	NA	2	2	1	negative									1	1
NC092	35	2	9	3	1	2	3	2	1	1	2	2	2	2	2	3	3	2	NA	1	2	1	negative									1	1
NC093	30	2	888	1	1	2	2	2	1	2	1	2	2	2	2	3	3	2	NA	1	2	1	negative									1	1
NC094	33	2	5	1	1	2	3	2	2	1	2	2	2	2	2	3	3	2	NA	1	2	1	negative									1	1
NC095	35	1	11	1	1	2	3	1	2	1	2	2	2	2	2	3	3	2	NA	1	2	1	negative									1	1
NC096	40	1	4	1	1	2	1	2	2	2	1	2	2	2	2	3	3	2	NA	1	2	1	negative									1	1
NC097	26	2	9	2	1	2	1	2	2	1	1	2	2	2	2	3	3	2	NA	1	2	1	negative									1	1
NC098	43	1	8	3	1	2	2	1	2	1	2	2	2	2	2	3	3	2	NA	1	2	1	negative									1	1
NC099	35	2	2	3	1	2	1	2	2	1	1	2	2	2	2	3	2	2	NA	1	2	1	negative									1	1
NC100	36	1	6	1	1	2	2	2	2	1	1	2	2	2	2	3	2	2	NA	1	2	1	negative									1	1
NC101	30	2	888	1	1	2	3	2	1	1	1	2	2	2	2	3	3	2	NA	1	2	1	negative									1	1
NC102	38	1	5	1	1	2	2	2	2	1	1	2	2	2	2	3	3	2	NA	1	2	2	negative									1	1
NC103	44	1	5	1	1	2	1	2	2	2	1	2	2	2	2	3	3	2	NA	1	2	1	negative									1	1
NC104	40	1	10	3	1	2	3	1	2	1	2	2	2	2	2	3	3	2	NA	2	2	1	negative									1	1
NC105	29	2	888	3	1	2	2	2	1	1	2	2	2	2	2	3	3	2	NA	2	2	1	negative									1	1
NC106	29	2	9	2	1	2	2	2	1	2	1	2	2	2	2	3	3	2	NA	1	2	1	negative									1	1
NC107	33	2	5	1	1	2	3	2	2	1	2	2	2	2	2	3	3	2	NA	2	2	1	negative									1	1
NC108	35	1	10	1	1	2	3	1	2	1	2	2	2	2	2	3	3	2	NA	1	2	1	negative									1	1
NC109	36	1	7	1	1	2	1	2	2	2	1	2	2	2	2	3	3	2	NA	2	2	1	1	resistance	sensitive		sensitive	sensetive	resistance	sensitive	sensitive	1	1
NC110	28	2	7	2	1	2	1	2	2	1	1	2	2	2	2	3	3	2	NA	1	2	1	negative									1	1
NC111	35	2	4	1	1	2	1	2	2	1	1	2	2	2	2	3	3	2	NA	2	2	1	negative									1	1
NC112	36	2	10	1	1	2	1	2	2	2	2	2	2	2	2	3	3	2	NA	2	2	1	negative									1	1
NC113	37	2	888	1	1	1	3	2	2	1	1	2	2	2	2	3	3	2	NA	1	2	1	negative									1	1
NC114	36	1	9	1	1	2	2	1	2	1	2	2	1	2	2	3	3	2	NA	2	2	1	negative									1	1
NC115	30	1	9	1	1	2	3	2	2	2	2	2	2	2	2	3	3	2	NA	1	2	1	negative									1	1
NC116	40	1	6	1	1	2	3	1	2	1	2	2	2	2	2	3	3	2	NA	2	2	1	negative									1	1
NC117	50	2	888	1	1	2	3	2	2	1	2	2	1	2	2	3	3	2	NA	1	2	1	negative									1	1
NC118	44	1	9	1	1	2	2	2	2	1	1	1	2	2	2	3	3	2	NA	2	2	1	negative									1	1
NC119	50	1	888	1	1	2	2	2	1	1	1	2	2	2	2	3	3	2	NA	1	2	1	negative									1	1
NC120	35	1	9	2	1	2	1	2	2	1	1	2	2	2	2	3	3	2	NA	2	2	1	negative									1	1
NC121	35	2	6	1	1	2	1	2	2	2	1	2	2	2	2	3	2	2	NA	1	2	1	negative									1	1
NC122	29	2	9	1	1	2	2	2	1	2	1	2	2	2	2	3	3	2	NA	2	2	1	negative									1	1
NC123	32	2	6	2	1	2	3	2	2	1	2	2	2	2	2	3	3	2	NA	1	2	1	negative									1	1
NC124	27	1	9	1	1	2	3	1	2	1	2	2	2	2	2	3	3	2	NA	1	2	1	negative									1	1
NC125	32	2	11	3	1	2	3	1	1	2	2	2	2	2	2	3	3	2	NA	2	2	1	negative									1	1
NC126	45	2	7	1	1	2	3	1	2	1	2	2	2	2	2	3	3	2	NA	2	2	1	negative									1	1
note the following key
888	represent missing data
